1 **Avian ANP32B does not support influenza A virus polymerase and influenza A virus relies exclusively**  
2 **on ANP32A in chicken cells.**

3 Jason S. Long<sup>1</sup>, Alewo Idoko-Akoh<sup>2</sup>, Bhakti Mistry<sup>1</sup>, Daniel H. Goldhill<sup>1</sup>, Ecco Staller<sup>1</sup>, Jocelyn Schreyer<sup>1</sup>,  
4 Craig Ross<sup>3</sup>, Steve Goodbourn<sup>3</sup>, Holly Shelton<sup>4</sup>, Michael A. Skinner<sup>1</sup>, Helen M. Sang<sup>2</sup>, Mike J. McGrew<sup>2</sup>,  
5 Wendy S. Barclay<sup>1</sup>

6 <sup>1</sup> Section of Molecular Virology, Imperial College London, St Mary's Campus, London, W2 1PG, UK

7 <sup>2</sup> The Roslin Institute and Royal (Dick) School of Veterinary Studies, University of Edinburgh, Easter  
8 Bush Campus, Midlothian, EH25 9RG, UK

9 <sup>3</sup> Institute for Infection and Immunity, St. George's, University of London, London, SW17 0RE, UK

10 <sup>4</sup> The Pirbright Institute, Surrey, GU24 0NF, UK

11 Corresponding author: [w.barclay@imperial.ac.uk](mailto:w.barclay@imperial.ac.uk)

12 **Summary (150 words)**

13 Influenza A viruses (IAV) are subject to species barriers that prevent frequent zoonotic transmission  
14 and pandemics. One of these barriers is the poor activity of avian IAV polymerases in human cells.  
15 Differences between avian and mammalian ANP32 proteins underlie this host range barrier. Human  
16 ANP32A and ANP32B homologues both support function of human-adapted influenza polymerase but  
17 do not support efficient activity of avian IAV polymerase which requires avian ANP32A. We show here  
18 that avian ANP32B is evolutionarily distinct from mammalian ANP32B, and that chicken ANP32B does  
19 not support IAV polymerase activity even of human-adapted viruses. Consequently, IAV does not  
20 replicate in chicken cells that lack ANP32A. Amino acid differences in LRR5 domain accounted for the  
21 inactivity of chicken ANP32B. Transfer of these residues to chicken ANP32A abolished support of IAV  
22 polymerase. Understanding ANP32 function will help develop antiviral strategies and aid the design  
23 of influenza virus resistant genome edited chickens.

24 **Keywords**

25 Influenza, polymerase, genome editing, disease, ANP32A, ANP32B, host pathogen interaction

26 **Introduction**

27 Influenza A viruses (IAV) infect a wide range of host species but originate from wild birds. Zoonotic  
28 transmission from the avian reservoir is initially restricted by host specific species barriers. Infection  
29 of new host species requires the virus to bind to cell surface receptors, utilise foreign host cellular

30 proteins whilst evading host restriction factors in order to replicate its genome, and finally transmit  
31 between individuals of the new host.

32 The negative sense RNA genome of influenza A virus (IAV) is replicated in the cell nucleus using a virally  
33 encoded RNA-dependent RNA polymerase, a heterotrimer composed of the polymerase basic 1 (PB1),  
34 polymerase basic 2 (PB2) and polymerase acidic (PA) proteins together with nucleoprotein (NP) that  
35 surrounds the viral RNA, forming the viral ribonucleoprotein complex (vRNP)<sup>1</sup>.

36 Crucially, the viral polymerase must co-opt host factors to carry out transcription and replication<sup>1</sup>. The  
37 PB2 subunit is a major determinant of the host restriction of the viral polymerase<sup>2</sup>. Avian IAV  
38 polymerases typically contain a glutamic acid at position 627 of PB2, and mutation to a lysine, the  
39 typical residue at this position in mammalian-adapted PB2<sup>3</sup>, can adapt the avian polymerase to  
40 function efficiently in mammalian cells. We have suggested that the restriction of avian IAV  
41 polymerase is due to a species specific difference in host protein ANP32A<sup>4</sup>. Avian ANP32A proteins  
42 have a 33 amino acid insertion, lacking in mammals, and overexpression of chicken ANP32A  
43 (chANP32A) in human cells rescues efficient function of avian origin IAV polymerases<sup>4</sup>. Removal of the  
44 33 amino acids from chANP32A prevents polymerase rescue, whilst conversely artificial insertion of  
45 the 33 amino acids into either huANP32A or B overcomes host restriction<sup>4</sup>. A naturally occurring splice  
46 variant of avian ANP32A lacks the first 4 amino acids of the 33 amino acid insertion, reducing the  
47 rescue efficiency of avian IAV polymerase in human cells<sup>5</sup>. This may be due to the disruption of a  
48 SUMOylation interaction motif, shown to enhance chANP32A's interaction with IAV polymerase<sup>6</sup>. In  
49 human cells, both family members ANP32A and ANP32B (huANP32A/B) are utilised by human adapted  
50 IAV polymerases, and are thought to stimulate genome replication from the viral cRNA template,  
51 although the exact mechanism remains unclear<sup>7</sup>.

52 Here we demonstrate that avian ANP32B is evolutionarily distinct from mammalian and other  
53 ANP32Bs. We demonstrate that two amino acids differences, N129 and D130, in the LRR5 domain of  
54 chANP32B render it unable to interact with and support IAV polymerase function. We used  
55 CRISPR/Cas9 to remove the exon encoding the 33 amino acid insertion from chANP32A or to knockout  
56 the entire protein in chicken cells. Edited cells that expressed the short chANP32A isoform lacking the  
57 additional 33 amino acids supported mammalian-adapted but not avian IAV polymerase activity. Cells  
58 completely lacking chANP32A did not support either mammalian or avian IAV polymerase activity and  
59 were refractory to IAV infection. These results suggest a strategy to engineer IAV resistance in poultry  
60 through genetic deletion or single amino acid changes of the LRR domain of ANP32A protein.

61 **Results**

62 **Phylogenetic analysis identifies that avian ANP32B is a paralog of mammalian ANP32B.** To examine  
63 the relatedness of ANP32 proteins from different species, we constructed a phylogenetic tree using  
64 vertebrate ANP32 protein sequences using *Drosophila* mapmodulin protein as an outgroup. ANP32A  
65 and E homologues formed well-supported monophyletic clades which included multiple avian and  
66 mammalian species (Figure 1 & S1). Most vertebrate ANP32B proteins formed a monophyletic clade  
67 but this clade did not include avian ANP32B proteins. Rather, avian ANP32B proteins were strongly  
68 supported as members of a distinct ANP32C clade with ANP32C from *Xenopus* and unnamed predicted  
69 proteins (ANP32C) from non-placental mammals. This suggests that avian ANP32B and mammalian  
70 ANP32B are paralogues: birds have lost the protein orthologous to human ANP32B and eutherian  
71 mammals have lost the protein orthologous to avian ANP32B. Synteny provides further evidence to  
72 support the relationship between avian ANP32B and ANP32C genes as *Xenopus* ANP32C, avian  
73 ANP32B and marsupial ANP32C are all found adjacent to ZNF414 and MYO1F on their respective  
74 chromosomes (Figure S2).

75 **Chicken ANP32B does not support IAV polymerase activity.** We and others have previously shown  
76 that both human ANP32A and B proteins support activity of a human-adapted IAV polymerase in  
77 human cells<sup>4,7,8</sup>. Using CRISPR/Cas9, we generated human eHAP1 cells that lacked expression of both  
78 human ANP32A and ANP32B protein (Staller et al. *in preparation*). In WT eHAP1 cells, human-adapted  
79 IAV polymerase (PB2 627K) was active, whereas avian polymerase (PB2 627E) was not. Exogenous  
80 expression of C-terminally FLAG-tagged chANP32A could rescue the activity of avian IAV polymerase  
81 whereas expression of chANP32B-FLAG, which naturally lacks the 33 amino acid insertion, did not  
82 (Figure 2a). In double knockout cells, neither human-adapted nor avian-origin polymerase were active.  
83 Expression of chANP32A-FLAG rescued activity of both polymerases but expression of chicken  
84 ANP32B-FLAG rescued neither, despite confirmation of robust expression by western blot (Figure 2b  
85 & c). This suggests that chicken ANP32B is not functional for IAV polymerase and that the IAV  
86 polymerase activity relies on ANP32A in chicken cells. To confirm this in chicken cells, we used  
87 CRISPR/Cas9 gene editing to generated chicken DF-1 cells which lacked chANP32B but retained  
88 chANP32A expression (DF-1 bKO Figure S3a). Wild type DF-1 cells had mRNAs for chANP32A, B and E  
89 (Figure S3d) and supported activity of avian IAV polymerase bearing either PB2 627E or 627K.  
90 Overexpression of chANP32B-FLAG did not affect activity (Figure 2d). DF-1 bKO cells also supported  
91 activity of both polymerases and again, exogenous expression of chANP32B had no effect. Since  
92 chicken cells lacking expression of chANP32B did not demonstrate any loss of IAV polymerase activity  
93 compared to WT, this implied that chANP32B is not functional for IAV polymerase and that IAV  
94 polymerase uses solely ANP32 family member A in chicken cells.

95 **Chicken cells lacking intact ANP32A do not support avian IAV polymerase activity.** To investigate the  
96 function of ANP32A in chicken cells we utilised a cell type that is more amenable to genome editing  
97 and clonal growth. Primordial germ cells (PGCs) are the lineage restricted stem cells which form the  
98 gametes in the adult animal. PGCs from the chicken embryo can be easily isolated and cultured  
99 indefinitely in defined medium conditions<sup>9,10</sup>. Chicken PGCs can be edited using artificial sequence-  
100 specific nucleases and subsequently used to generate genome edited offspring<sup>11,12</sup>. Under  
101 appropriate *in vitro* conditions PGCs can acquire pluripotency and be subsequently differentiated into  
102 multiple cell types<sup>13-16</sup>. Chicken PGC cells were genome edited using CRISPR/Cas9 and appropriate  
103 guide RNAs to generate chANP32A knock-out cells (aKO) by targeted deletion of 8 nucleotides in exon  
104 1. PGCs lacking the 33 amino acid insertion in chANP32A were generated using a pair of guide RNAs  
105 to remove exon 5 resulting in chicken cells with a mammalian-like ANP32A ( $\Delta$ 33) (Figure 3a). The  
106 precise deletions were confirmed by sequence analysis of genomic DNA (Figure S3c). We  
107 differentiated the edited chicken PGCs into fibroblast-like cells using serum induction with the aim of  
108 generating cell lines to test avian IAV polymerase activity (Figure S4). The predicted alterations of  
109 ANP32A protein in these cells were confirmed by western blot analysis of the PGC-derived fibroblast  
110 cells (Figure 3b). WT,  $\Delta$ 33, and aKO and PGC-derived cell lines were tested for the functional effects  
111 of alteration or loss of chANP32A expression on IAV polymerase activity measured by reconstituted  
112 minigenome assay. Both avian (PB2 627E) and human-adapted polymerase (PB2 627K) were active in  
113 WT fibroblast cells (Figure 3c). Removal of the 33 amino acids from ANP32A resulted in restriction of  
114 the 627E polymerase but not the 627K polymerase, mirroring the avian IAV polymerase phenotype  
115 observed in mammalian cells<sup>4</sup>. Both polymerases were restricted in cells lacking chANP32A (KO).  
116 Expression of exogenous chANP32A in  $\Delta$ 33 and aKO cells rescued avian IAV polymerase activity (Figure  
117 3d & e) demonstrating the specificity of the genetic alterations. The lack of polymerase activity in the  
118 aKO PGC cell line supports the hypothesis that, in the absence of chANP32A, the remaining ANP family  
119 members including chANP32B or chANP32E could not support IAV polymerase activity in chicken cells,  
120 even though ANP32B and E mRNAs were readily detected in both DF-1 and PGC cells (Figure S3d & e).

121 **Functional differences between chicken ANP32A and ANP32B map to the LRR domain sequence.**

122 ANP32 proteins share a common domain organization in which an N terminal domain consisting of 5  
123 consecutive leucine rich repeats (LRR 1-5) is followed by a cap and central domain and a C terminal  
124 low complexity acidic region (LCAR). In avian ANP32A proteins (except some flightless birds) a  
125 sequence duplication, derived in part from nucleotides that encode 27 amino acids (149-175), has  
126 resulted in an additional exon and an insertion of up to 33 amino acids between the central domain  
127 and the LCAR (Figure 4a). We previously showed that insertion of the 33 amino acids from the central  
128 domain of chANP32A into the equivalent region of the human ANP32A or huANP32B proteins

129 conferred the ability to rescue the activity of a restricted avian IAV polymerase in human cells. The  
130 equivalent 33 amino acid insertion into chANP32B (chANP32B<sup>33</sup>) did not support avian IAV polymerase  
131 activity (Figure 4b). In order to ascertain the domains of chANP32B that rendered it non-functional for  
132 IAV polymerase activity, we generated chimeric constructs between human and chicken ANP32B. To  
133 measure the rescue of avian IAV polymerase in human 293T cells, all chimeric constructs had the 33  
134 amino acid sequence derived from chANP32A inserted between the LRR and LCAR domains. Western  
135 blot analysis and immunofluorescence confirmed that all chimeric constructs were expressed and  
136 localized to the cell nucleus as for the wild type ANP32 proteins. (Figure 4b & S5). Swapping the LCAR  
137 domain of chANP32B into huANP32B<sup>33</sup> did not prevent the rescue of avian IAV polymerase  
138 (huANP32B<sup>33</sup><sub>LCAR</sub>). Introduction of the central domain of chANP32B into huANP32B (huANP32B<sup>33</sup><sub>CENT</sub>)  
139 significantly reduced rescue efficiency and swapping the LRR domain of chANP32B (huANP32B<sup>33</sup><sub>LRR</sub>)  
140 rendered the protein non-functional to avian IAV polymerase (Figure 4b). By sequential swapping of  
141 each LRR repeat, the 5<sup>th</sup> LRR of chANP32B was found to be the domain that prevented rescue of avian  
142 IAV polymerase (Figure 4b). The fifth LRR contains five amino acid differences between human and  
143 chicken ANP32B, highlighted on the crystal structure of huANP32A, plus an additional one difference  
144 to chANP32A (Figure 4d & S6). Swapping chANP32B's fifth LRR into chANP32A also prevented rescue  
145 of avian IAV polymerase activity in human cells (chANP32A<sub>LRR5</sub>) (Figure 4c). Introduction of the single  
146 amino acid changes derived from the chANP32B LRR5 sequence into chANP32A revealed that  
147 mutations N129I and D130N significantly reduced the ability of chANP32A to rescue avian IAV  
148 polymerase activity in human cells (Figure 4c). Minigenome assays with co-expressed chANP32A or  
149 chANP32A<sub>N129I</sub> in aKO chicken fibroblast cells confirmed that the 129I mutation significantly reduced  
150 the ability of chANP32A to support avian-origin (PB2 627E) or human-adapted (PB2 627K) IAV  
151 polymerase activity (Figure 4e).

152 **Sequence of amino acids 149-175 of the central domain of chANP32A are required to support**  
153 **activity of both avian and human-adapted IAV polymerase.** As chANP32A KO PGC-derived fibroblast  
154 cells did not support of IAV polymerase despite expressing chANP32B, we were able to use these cells  
155 to understand in more detail the sequences in chANP32A required for IAV polymerase activity. The  
156 results above showed that the 33 amino acid insertion, fifth LRR and central domain are important for  
157 the ability of chANP32A to support function of avian IAV polymerase. We performed the minigenome  
158 assay in aKO cells with polymerases containing either PB2 627E and 627K with co-expression of further  
159 chANP32 mutants including: chANP32A in which the 27 amino acids in the central domain preceding  
160 the 33 amino acid insertion were scrambled (chANP32A<sub>scr149-175</sub>) or chANP32A with the 33 amino acid  
161 insertion scrambled (chANP32A<sub>scr176-208</sub>) (Figure 5a). Both mutants were expressed and localized to the  
162 nucleus (Figure 5c and S5). The first mutant, chANP32A<sub>scr149-175</sub>, did not support either PB2 627E or

163 627K polymerase, suggesting the sequence of the central domain is important for function of IAV  
164 polymerase. The second mutant, chANP32A<sub>scr176-208</sub>, only supported PB2 627K function, confirming  
165 that the sequence of the 33 amino acid insertion, not just the extended length is required for avian  
166 IAV polymerase (PB2 627E) (Figure 5b).

167 **A single amino acid difference between chANP32B and chANP32A abrogates binding of chANP32A**  
168 **to IAV polymerase.** An interaction between ANP32A and IAV polymerase was demonstrated  
169 previously that is dependent on the presence of all three polymerase subunits (Mistry et al. *in*  
170 *preparation* & <sup>5,6</sup>). To examine the interaction between IAV polymerase and chANP32 proteins we  
171 employed a split luciferase complementation assay as a quantitative measure of binding <sup>17,18</sup>. The C-  
172 terminus of the PB1 subunit of avian origin IAV polymerase was fused with one half of *gaussia*  
173 luciferase (PB1<sup>luc1</sup>) and the C-terminus of chicken ANP32A or B with the second half (chANP32A<sup>luc2</sup> and  
174 chANP32B<sup>luc2</sup>) (Figure 6a). Reconstitution of PB1<sup>luc1</sup>, PB2 and PA together with chANP32A<sup>luc2</sup> in human  
175 293T cells gave a strong Normalised Luciferase Ratio (NLR) (Figure S6a) with polymerases containing  
176 either PB2 627E or 627K (Figure 6b). Luciferase complementation was significantly less between  
177 polymerase and chANP32B<sup>luc2</sup>, and even insertion of the 33 amino acids from chANP32A did not  
178 restore the signal (chANP32B<sub>33</sub><sup>luc2</sup>) (Figure 6b). When chANP32A carried the single N129I mutation  
179 (chANP32A<sub>N129I</sub><sup>luc2</sup>), luciferase complementation was reduced 22-fold for PB2 627E polymerase and  
180 52-fold for PB2 627K polymerase (Figure 6c & S7). These results suggest that the loss of support of  
181 polymerase function by chANP32A<sub>N129I</sub> was due to a disruption of binding to IAV polymerase.

182 ANP32A proteins bind to histones as part of their role in chromatin regulation <sup>19</sup>. To measure if the  
183 mutation N129I had any effect on this cellular interaction, we generated expression plasmids that  
184 encoded human histone 4 with luc1 fused to the C-terminus (H4<sup>luc1</sup>) and histone 3.1 with luc2 fused  
185 to the C terminus (H3<sup>luc2</sup>). As expected, H4<sup>luc1</sup> and H3<sup>luc2</sup> generated a strong NLR, reflecting their  
186 interaction in the nucleosome <sup>20</sup>. The ability of chANP32A to bind histone 4 was not impaired by  
187 mutation N129I, suggesting chANP32<sub>N129I</sub> was not altered in this cellular role, despite abrogation of its  
188 support of IAV polymerase (Figure 6d).

### 189 **Viral replication is abrogated in chicken cells lacking ANP32A.**

190 The data above suggest that chANP32B cannot substitute for chANP32A in support of IAV polymerase  
191 in chicken cells. Since chicken cells that completely lack expression of chANP32A show no polymerase  
192 activity in the minigenome assay, they might be refractory to IAV infection. Multi-cycle growth kinetics  
193 of recombinant influenza A viruses were measured in WT, Δ33 and aKO PGC-derived fibroblast cells  
194 (Figure 7). To ensure robust infection, recombinant viruses were generated carrying H1N1 vaccine  
195 strain PR8 haemagglutinin (HA), neuraminidase (NA) and M genes; this also mitigated the risks of

196 working with avian influenza viruses with novel antigenicity. Infectious titres of recombinant virus with  
197 internal genes of avian H5N1 virus A/England/1991/50-92 were reduced almost 3000-fold at 24 hours  
198 post infection in absence of chANP32A protein (Figure 7a). Similarly, a recombinant virus with internal  
199 genes from avian H9N2 virus A/duck/Belgium/24311/12 also replicated poorly in aKO cells (Figure 7b).  
200 An isogenic pair of viruses with internal genes from the H7N9 virus A/Anhui/1/2013, carrying either  
201 PB2 627E or 627K, replicated efficiently in WT fibroblasts, but not in aKO cells where peak viral titres  
202 were more than 200-fold less (Figure 7c & d). Comparison of viral titres in supernatant recovered at  
203 12 hours post infection and later time points by two-way ANOVA revealed that there was no  
204 statistically significant increase over time in viral titres released from aKO cells, in contrast with WT  
205 cells where viral titres were significantly amplified at later time points (Figure 7). In conclusion, PGC  
206 derived fibroblast cells lacking chANP32A were effectively resistant to IAV replication.

207

## 208 Discussion

209 We show that avian origin IAV polymerases rely exclusively on chicken ANP32A family member for  
210 their replication, because they are unable to co-opt chicken ANP32B. We found avian ANP32B proteins  
211 formed a separate phylogenetic group from other ANP32Bs and were more closely related to ANP32C  
212 proteins of other species than to mammalian ANP32B members (Figure 1 & S1). Synteny  
213 demonstrated that ANP32C was present in coelacanth, amphibians and non-placental mammals and  
214 that this locus was identical to ANP32B in birds (Figure S2). ANP32C has been lost in placental  
215 mammals. Human ANP32C is an intronless gene and has been suggested to be a pseudogene derived  
216 from ANP32A<sup>19</sup>. There was no evidence of a mammalian ANP32B equivalent in birds. We propose that  
217 avian ANP32Bs should be renamed as ANP32Cs.

218 Chicken ANP32B could not support influenza polymerase function due to an amino acid difference in  
219 LRR5 at residue 129 that adversely affected the interaction between chANP32B and influenza  
220 polymerase (Figure 6). Other avian ANP32B proteins, including those of duck and turkey, carry  
221 isoleucine at residue 129 suggesting that our findings may also be applicable to other avian hosts  
222 (Figure S6). The replacement of the exposed polar residue, asparagine (N129) with the hydrophobic  
223 isoleucine (I) may have led to the disruption of a key electrostatic interaction between ANP32A and  
224 the virus polymerase complex. In addition to the residue 129I, the central domain (amino acids 141-  
225 175) of chANP32B also contributed to its poor efficiency at rescuing avian IAV polymerase function in  
226 human cells (Figure 4). This, together with the observation that scrambling amino acids 149-175 in  
227 chANP32A prevented both human-adapted and avian IAV polymerase function (Figure 4) suggests that  
228 LRR5 and the central domain of ANP32A are crucial to IAV polymerase function. The observation that

229 scrambling the 33-amino acid insertion prevented avian IAV polymerase rescue (Figure 5) is consistent  
230 with results from by Domingues and Hale and Baker and colleagues which showed that the SUMO  
231 Interaction motif (SIM)-like sequence present in the 33 amino acid insertion (VLSLV), was required for  
232 strong binding to both 627E and 627K polymerase and its deletion or mutation decreased its ability to  
233 support avian IAV polymerase activity in human cells<sup>5,6</sup>. Understanding the domains important to  
234 binding and function may help us understand the mechanism by which ANP32A or B support IAV  
235 polymerase which is still not fully elucidated<sup>7</sup>.

236 Chicken cells lacking ANP32A did not support activity of avian and human-adapted IAV polymerase in  
237 minigenome assay (Figure 2). Very low viral titres were recovered following infection in the aKO  
238 fibroblast cells (Figure 7). IAV polymerase may function, albeit inefficiently, in the absence of  
239 chANP32A in the context of virus infection. Other viral products present during virus infection such as  
240 NEP may partly compensate for the block in replication in cells that lack chANP32A. Indeed NEP  
241 expression has been reported to rescue avian polymerase replication in human cells<sup>21</sup>. Nonetheless  
242 the very low level of replication observed in the chicken cells that lack chANP32A *in vitro* implies that  
243 *in vivo*, chickens that do not express ANP32A may be resistant to infection.

244 The use of the PGC-derived chicken cells to investigate a host factor essential for virus raises the  
245 possibility of generating genome-edited chicken models resistant or resilient to infection. Chicken  
246 PGCs can be efficiently genome-edited to generate specific haplotypes<sup>22</sup>. Our novel method of chicken  
247 PGC differentiation into fibroblast-like cells enabled robust testing of a defined genotype, and will  
248 permit future investigation of other host genetic factors identified through forward genetic screens  
249 and suspected to play important roles in virus infections<sup>23,24</sup>.

250 In summary, we provide evidence that specific domains of ANP32 proteins are important for the  
251 function of IAV polymerases and describe a lack of redundancy in the involvement of ANP32 family  
252 members to support IAV polymerase complex in chicken cells that is determined by the variation in  
253 ANP32 protein sequences. These data may aid in the design of novel small molecule inhibitors that  
254 disrupt the ANP32-polymerase interface and form the basis of a potential pathway for the generation  
255 of influenza virus-resistant animals.

256



257 **Acknowledgments**

258 JSL, CR, SG, MAS, HMS and WSB were supported by Biotechnology and Biological Sciences Research  
259 Council (BBSRC) via Strategic LoLa grant BB/K002465/1 “Developing Rapid Responses to Emerging  
260 Virus Infections of Poultry (DRREVIP)”. Al-A was funded by a Principal’s Career Development PhD  
261 Scholarship from the University of Edinburgh. BM was supported by the Wellcome Trust. DHG, JS and  
262 WSB were supported by grant 205100 from the Wellcome Trust. ES was supported by an Imperial  
263 College President's Scholarship. HS was funded from BBSRC grants BB/R007292/1 and  
264 BBS/E/I/00007034. HMS and MJM were supported by Institute Strategic Grant Funding from the  
265 BBSRC (BB/P013732/1 and BB/P013759/1).

266

267 **Author contributions**

268 JSL, Al-A, SG, HS, MAS, HMS, MJM and WSB designed the research. JSL, Al-A, BM, JS, CR performed  
269 experiments. ES and HS contributed new reagents. JSL, Al-A, DHG, MJM analysed data. JSL, Al-A, DHG,  
270 SG, HS, MAS, HMS, MJM and WSB wrote the paper.

271

272 **Declarations of interests**

273 Authors declare no competing interests.

274

275 **References**

- 276 1. Te Velhuis, A. J. W. & Fodor, E. Influenza virus RNA polymerase: insights into the  
277 mechanisms of viral RNA synthesis. *Nat. Rev. Microbiol.* 14, 479–93 (2016).
- 278 2. Almond, J. W. A single gene determines the host range of influenza virus. *Nature* 270, 617–8  
279 (1977).
- 280 3. Subbarao, E. K., London, W. & Murphy, B. R. A single amino acid in the PB2 gene of influenza  
281 A virus is a determinant of host range. *J. Virol.* 67, 1761–4 (1993).
- 282 4. Long, J. S. *et al.* Species difference in ANP32A underlies influenza A virus polymerase host  
283 restriction. *Nature* 529, 101–104 (2016).
- 284 5. Baker, S. F., Ledwith, M. P. & Mehle, A. Differential Splicing of ANP32A in Birds Alters Its  
285 Ability to Stimulate RNA Synthesis by Restricted Influenza Polymerase. *Cell Rep.* 24, 2581–

- 286 2588.e4 (2018).
- 287 6. Domingues, P. & Hale, B. G. Functional Insights into ANP32A-Dependent Influenza A Virus  
288 Polymerase Host Restriction. *Cell Rep.* 20, 2538–2546 (2017).
- 289 7. Sugiyama, K., Kawaguchi, A., Okuwaki, M. & Nagata, K. pp32 and APRIL are host cell-derived  
290 regulators of influenza virus RNA synthesis from cRNA. *Elife* (2015). doi:10.7554/eLife.08939
- 291 8. Watanabe, T. *et al.* Influenza Virus-Host Interactome Screen as a Platform for Antiviral Drug  
292 Development. *Cell Host Microbe* 16, 795–805 (2014).
- 293 9. van de Lavoie, M.-C. *et al.* Germline transmission of genetically modified primordial germ  
294 cells. *Nature* 441, 766–9 (2006).
- 295 10. Whyte, J. *et al.* FGF, Insulin, and SMAD Signaling Cooperate for Avian Primordial Germ Cell  
296 Self-Renewal. *Stem cell reports* 5, 1171–1182 (2015).
- 297 11. Park, T. S., Lee, H. J., Kim, K. H., Kim, J.-S. & Han, J. Y. Targeted gene knockout in chickens  
298 mediated by TALENs. *Proc. Natl. Acad. Sci. U. S. A.* 111, 12716–21 (2014).
- 299 12. Oishi, I., Yoshii, K., Miyahara, D., Kagami, H. & Tagami, T. Targeted mutagenesis in chicken  
300 using CRISPR/Cas9 system. *Sci. Rep.* 6, 23980 (2016).
- 301 13. Matsui, Y., Zsebo, K. & Hogan, B. L. Derivation of pluripotential embryonic stem cells from  
302 murine primordial germ cells in culture. *Cell* 70, 841–7 (1992).
- 303 14. Shim, H. *et al.* Isolation of pluripotent stem cells from cultured porcine primordial germ cells.  
304 *Biol. Reprod.* 57, 1089–95 (1997).
- 305 15. Shambloott, M. J. *et al.* Derivation of pluripotent stem cells from cultured human primordial  
306 germ cells. *Proc. Natl. Acad. Sci. U. S. A.* 95, 13726–31 (1998).
- 307 16. Park, T. S. & Han, J. Y. Derivation and characterization of pluripotent embryonic germ cells in  
308 chicken. *Mol. Reprod. Dev.* 56, 475–82 (2000).
- 309 17. Munier, S., Rolland, T., Diot, C., Jacob, Y. & Naffakh, N. Exploration of binary virus-host  
310 interactions using an infectious protein complementation assay. *Mol. Cell. Proteomics* 12,  
311 2845–55 (2013).
- 312 18. Cassonnet, P. *et al.* Benchmarking a luciferase complementation assay for detecting protein  
313 complexes. *Nat. Methods* 8, 990–2 (2011).
- 314 19. Reilly, P. T., Yu, Y., Hamiche, A. & Wang, L. Cracking the ANP32 whips: important functions,

- 315           unequal requirement, and hints at disease implications. *Bioessays* 36, 1062–71 (2014).
- 316   20.   Luger, K., Mäder, A. W., Richmond, R. K., Sargent, D. F. & Richmond, T. J. Crystal structure of  
317           the nucleosome core particle at 2.8 Å resolution. *Nature* 389, 251–60 (1997).
- 318   21.   Mänz, B., Brunotte, L., Reuther, P. & Schwemmle, M. Adaptive mutations in NEP compensate  
319           for defective H5N1 RNA replication in cultured human cells. *Nat. Commun.* 3, 802 (2012).
- 320   22.   Idoko-Akoh, A., Taylor, L., Sang, H. M. & McGrew, M. J. High fidelity CRISPR/Cas9 increases  
321           precise monoallelic and biallelic editing events in primordial germ cells. *Sci. Rep.* 8, 15126  
322           (2018).
- 323   23.   Smith, J. *et al.* A comparative analysis of host responses to avian influenza infection in ducks  
324           and chickens highlights a role for the interferon-induced transmembrane proteins in viral  
325           resistance. *BMC Genomics* 16, 574 (2015).
- 326   24.   Wang, Y., Lupiani, B., Reddy, S. M., Lamont, S. J. & Zhou, H. RNA-seq analysis revealed novel  
327           genes and signaling pathway associated with disease resistance to avian influenza virus  
328           infection in chickens. *Poult. Sci.* 93, 485–93 (2014).
- 329   25.   Pettersen, E. F. *et al.* UCSF Chimera--a visualization system for exploratory research and  
330           analysis. *J. Comput. Chem.* 25, 1605–12 (2004).
- 331   26.   Rueden, C. T. *et al.* ImageJ2: ImageJ for the next generation of scientific image data. *BMC*  
332           *Bioinformatics* 18, 529 (2017).
- 333   27.   McGrew, M. J. *et al.* Localised axial progenitor cell populations in the avian tail bud are not  
334           committed to a posterior Hox identity. *Development* 135, 2289–99 (2008).
- 335   28.   Montague, T. G., Cruz, J. M., Gagnon, J. A., Church, G. M. & Valen, E. CHOPCHOP: a  
336           CRISPR/Cas9 and TALEN web tool for genome editing. *Nucleic Acids Res.* 42, W401-7 (2014).
- 337   29.   Labun, K., Montague, T. G., Gagnon, J. A., Thyme, S. B. & Valen, E. CHOPCHOP v2: a web tool  
338           for the next generation of CRISPR genome engineering. *Nucleic Acids Res.* 44, W272-6 (2016).
- 339   30.   Ran, F. A. *et al.* Genome engineering using the CRISPR-Cas9 system. *Nat. Protoc.* 8, 2281–  
340           2308 (2013).
- 341   31.   Ran, F. A. *et al.* Double nicking by RNA-guided CRISPR Cas9 for enhanced genome editing  
342           specificity. *Cell* 154, 1380–9 (2013).
- 343   32.   Moncorgé, O. *et al.* Investigation of influenza virus polymerase activity in pig cells. *J. Virol.* 87,

- 344 384–94 (2013).
- 345 33. Long, J. S. *et al.* The effect of the PB2 mutation 627K on highly pathogenic H5N1 avian  
346 influenza virus is dependent on the virus lineage. *J. Virol.* 87, 9983–96 (2013).
- 347 34. Bradford, M. M. A rapid and sensitive method for the quantitation of microgram quantities of  
348 protein utilizing the principle of protein-dye binding. *Anal. Biochem.* 72, 248–54 (1976).
- 349 35. Edgar, R. C. MUSCLE: multiple sequence alignment with high accuracy and high  
350 throughput. *Nucleic acids research*, **32**(5), 1792-1797 (2004).
- 351 36. Stamatakis, A. RAxML version 8: a tool for phylogenetic analysis and post-analysis of large  
352 phylogenies. *Bioinformatics* **30**, 1312-1313, doi:10.1093/bioinformatics/btu033 (2014).
- 353 37. Miller, M.A., Pfeiffer, W., and Schwartz, T. "Creating the CIPRES Science Gateway for  
354 inference of large phylogenetic trees" in Proceedings of the Gateway Computing  
355 Environments Workshop (GCE), 14 Nov. 2010, New Orleans, LA pp 1 – 8 (2010).

356

## 357 **Figure legends**

### 358 **Figure 1. Phylogenetic and sequence analysis reveals avian ANP32B to be a paralog of mammalian** 359 **ANP32B.**

360 The best maximum-likelihood tree was calculated from a set of ANP32 proteins with mapmodulin from  
361 *Drosophila melanogaster* as an outgroup using RAxML with 100 bootstraps. This figure is a cladogram  
362 showing the relationships between mammalian ANP32s, avian ANP32s and ANP32s from *Xenopus*  
363 *tropicalis*. Selected bootstrap values show the relationship between different ANP32 protein clades.  
364 Avian ANP32B clade is shown in green. The full tree is shown in Figure S1.

### 365 **Figure 2. Chicken ANP32B is not functional for IAV polymerase.**

366 Cells were transfected with avian H5N1 50-92 polymerase (PB2 627E or 627K) together with NP, firefly  
367 minigenome reporter, *Renilla* expression control, either Empty vector (control) or ANP32 expression  
368 plasmid and incubated at 37°C for 24hours. **a.** Minigenome assay in human eHAP1 cells with co-  
369 expressed Empty vector, FLAG-tagged chANP32A or chANP32B. **b.** Minigenome assay in double  
370 knockout (dKO) eHAP1 cells. **c.** Western blot analysis of dKO eHAP1 cell minigenome assay confirming  
371 expression of PB2 and FLAG-tagged chANP32A and B. **d.** Minigenome assay in WT DF-1 cells with either  
372 co-expressed Empty vector or chANP32B. **e.** Minigenome assay in DF-1 ANP32B knockout (bKO) cells  
373 with either co-expressed Empty vector or chANP32B. Data shown are firefly activity normalised to

374 *Renilla*, plotted as mean  $\pm$ SEM. Two-way ANOVA with Dunnet's multiple comparisons to Empty vector.  
375 ns= not significant, \*\*\*\*p<0.0001.

376 **Figure 3. Chicken PGC derived fibroblast cells lacking ANP32A or the 33 amino acid insertion do not**  
377 **support avian IAV polymerase activity.**

378 **a.** Schematic of CRISPR/Cas9 RNA guide targets used to generate aKO (exon1) and  $\Delta$ 33 (exon 5) PGC  
379 cell lines. **b.** Western blot analysis of ANP32A and  $\beta$ -actin expression in WT, KO and  $\Delta$ 33 PGC-derived  
380 fibroblast cells. **c.** Minigenome assay in WT,  $\Delta$ 33 or aKO PGC derived fibroblast cells with either  
381 PB2627E (black) or 627K (grey) polymerase derived from avian H5N1 50-92 virus . **d.** Minigenome  
382 assay in WT,  $\Delta$ 33 or aKO cells with avian H5N1 50-92 PB2 627E polymerase co-transfected with Empty  
383 vector (black) or FLAG-tagged chANP32A (grey). **e.** Western blot analysis of PB2, FLAG and Histone 3.  
384 Data shown are firefly activity normalised to *Renilla*, plotted as mean  $\pm$ SEM. Two-way ANOVA with  
385 Dunnet's multiple comparisons to WT. ns= not significant, \*\*P < 0.01, \*\*\*p<0.001, \*\*\*\*p<0.0001.

386 **Figure 4. Lack of functional support for IAV polymerase by chicken ANP32B maps to differences in**  
387 **LRR5 domain.**

388 **a.** Schematic of chicken ANP32A protein highlighting the different domains and LRR sequences (LRR  
389 1-5). **b.** Human 293T cells were transfected with avian H5N1 50-92 polymerase (PB2 627E) together  
390 with NP, pHOM1-firefly minigenome reporter, *Renilla* expression control, either Empty vector or  
391 FLAG-tagged ANP32 expression plasmid and incubated at 37°C for 24hours. Western blot analysis  
392 shown below (FLAG and Vinculin). **c.** 293T minigenome assay in 293T cells (PB2 627E) with FLAG-  
393 tagged WT or mutant chANP32A expression plasmids with associated western blot (FLAG and PCNA).  
394 **d.** huANP32A crystal structure (PDB 4X05) with residues K116, N127, N129, D130 and K137 highlighted  
395 using UCSF Chimera<sup>25</sup>. **e.** Minigenome assay of avian H5N1 50-92 polymerase with either PB2 627E or  
396 627K in PGC-derived fibroblast aKO cells, together with co-expressed Empty vector, chANP32A or  
397 chANP32A<sub>N129I</sub>. Data shown are firefly activity normalised to *Renilla*, plotted as mean  $\pm$ SEM. One-way  
398 ANOVA with Tukey's comparison to chANP32A (b&c) or two-way ANOVA with Dunnet's multiple  
399 comparisons to chANP32A (e). ns= not significant, \*p<0.05, \*\*P < 0.01, \*\*\*\*P < 0.0001.

400 **Figure 5. Sequence of amino acids 149-175 of the central domain of chANP32A are required to**  
401 **support activity of both avian and human-adapted IAV polymerase.**

402 **a.** Schematic of chANP32A showing the sequence of amino acids in the central domain (149-175 or 33  
403 amino acid insertion (176-208) and the randomly scrambled sequence in red. **b.** Minigenome assay of  
404 avian H5N1 50-92 polymerase with either PB2 627E or 627K in PGC-derived fibroblast aKO cells with  
405 co-expressed Empty plasmid or FLAG-tagged WT chANP32A, chANP32A<sub>scr149-175</sub> or chANP32A<sub>scr176-208</sub>

406 expression plasmids. **c.** Western blot analysis of PB2 (627E), lamin B1 and FLAG. Data shown are firefly  
407 activity normalised to *Renilla*, plotted as mean  $\pm$ SEM. Two-way ANOVA with Dunnet's multiple  
408 comparisons to chANP32A. ns= not significant, \*\*\*\*P < 0.0001.

409 **Figure 6. A single amino acid change (N129I) derived from chANP32B disrupts chANP32A support of**  
410 **influenza polymerase activity by abrogating binding to IAV polymerase.**

411 **a.** Diagram of the split *Gaussia* luciferase system, demonstrating how ANP32 fused to luciferase  
412 fragment luc2 may bind to polymerase containing PB1 fused to luciferase fragment luc1 and  
413 complement full luciferase, which then reacts with substrate to generate a measurable  
414 bioluminescent signal. **b.** Human 293T cells were transfected with PB1 fused to luc1 (PB1<sup>luc1</sup>), PB2  
415 (627E or K), PA and either chANP32A, chANP32B or chANP32B<sub>33</sub> fused to luc2 (control wells were  
416 transfected with all components but with unfused PB1 and luc1 or chANP32 and luc2). **c.** As (b) but  
417 with either chANP32A<sup>luc2</sup> or chANP32A<sub>N129I</sub><sup>luc2</sup>. **d.** 293T cells transfected with either chANP32A<sup>luc2</sup> or  
418 chANP32A<sub>N129I</sub><sup>luc2</sup> and histone 4 fused to luc1 (or with unfused controls) or with H4luc1 and histone 3  
419 fused to luc2. All data are Normalised Luciferase Ratio (Figure S5). One-way ANOVA (d) or two-way  
420 ANOVA with Dunnet's multiple comparisons to chANP32A (b&c). ns= not significant, \*\*\*\*P < 0.0001.

421 **Figure 7. Viral replication is abrogated in chicken PGC fibroblast cells lacking ANP32A.**

422 WT (black lines) or aKO (red lines) PGC-derived fibroblast cells were infected with reassortant viruses  
423 (containing PR8 HA, NA and M genes and internal genes from avian IAVs), incubated at 37°C in the  
424 presence of trypsin, and cell supernatants harvested at described time-points and PFU ml<sup>-1</sup> measured  
425 by plaque assay on MDCK cells. **a.** H5N1 50-92 (MOI 0.001). **b.** H9N2 Belgium (MOI 0.005). H7N9 Anhui  
426 PB2 627E (**c**) or PB2 627K (**d**) (MOI 0.005). Multiple t-tests with Holm-Sidak comparison. ns= not  
427 significant, \*p<0.05, \*\*P < 0.01, \*\*\*p<0.001.

428

## 429 **Methods**

### 430 **Animal use**

431 The GFP<sup>+</sup> PGCs used in the experiments were obtained by crossing the Roslin Green (ubiquitous GFP)  
432 line of transgenic chickens with a flock of commercial Hyline layer hens maintained at the Roslin  
433 Institute to produce heterozygous fertile eggs for PGC derivations<sup>27</sup>. Commercial and transgenic  
434 chicken lines were maintained and bred under UK Home Office License. All experiments were  
435 performed in accordance with relevant UK Home Office guidelines and regulations. The experimental

436 protocol and studies were reviewed by the Roslin Institute Animal Welfare and Ethical Review Board  
437 (AWERB) Committee.

#### 438 **Plasmid constructs**

439 ANP32A guide RNAs (gRNA) were designed using CHOPCHOP gRNA web tool  
440 (<http://chopchop.cbu.uib.no/>)<sup>28,29</sup>. gRNA 5'-CGGCCATGGACATGAAGAAA-3' targeting ANP32A exon1,  
441 and gRNAs :5'-AGCTGGAAGCAATATGTACT-3' and 5'-CATTCCCCTCGCTCCTTCAA-3' targeting either side  
442 of exon 5 ( $\Delta$ 33 PGC cells) were cloned into pSpCas9(BB)-2A-Puro (pX459 v2.0; a gift from Dr. Feng  
443 Zhang) using materials and methods described by previously<sup>30</sup>. For DF-1 ANP32B gRNAs, the guides 5'-  
444 TTCAGATGATGGGAAGATCG-3' and 5'-GGTTCTCAAATCTGAAGAG-3' were cloned into the double  
445 "nickase" vectors pSpCas9n(BB)-2A-GFP (pX461) and pSpCas9n(BB)-2A-Puro (pX462) respectively<sup>30,31</sup>.

446 *Gaussia* luc1 and luc2 were generated by gene synthesis (GeneArt, ThermoFisher) using the sequence  
447 previously described<sup>18</sup>. *Homo sapiens* Histone 4 (NP\_003533.1) and 3.1 (NP\_003520.1) were  
448 generated gene synthesis (GeneArt, ThermoFisher). Luc1 or luc2 were added to the C-termini of  
449 ANP32, PB1, H4 or H3.1 using the linker sequence, AAAGGGSGGGGS, by overlapping PCR. The 33  
450 amino acid insertion was added to huANP32B after residue 173 and to chANP32B after residue 181  
451 (preserving an acid region before SIM motif<sup>6</sup>). The LRR (amino acids 1-149), central domain (amino  
452 acids 150-175) or LCAR (amino acids 176-262) from chANP32B were swapped into huANP32B<sub>33</sub> to  
453 generate chimeric constructs. ANP32 constructs were made by overlapping PCR or by gene synthesis  
454 (GeneArt, ThermoFisher) with either a FLAG tagged fused to the C-terminus with a GSG linker or to  
455 mCherry with a GSGGGSGG linker.

#### 456 **Cells and cell culture**

457 Human embryonic kidney (293T) (ATCC), human lung adenocarcinoma epithelial cells (A549) (ATCC)  
458 and Madin-Darby canine kidney (MDCK) cells (ATCC) were maintained in cell culture media (Dulbecco's  
459 modified Eagle's medium (DMEM; Invitrogen) supplemented with 10% fetal calf serum (FCS) (Biosera),  
460 1% non-essential amino acids (NEAA) and with 1% penicillin-streptomycin (Invitrogen)) and  
461 maintained at 37 °C in a 5% CO<sub>2</sub> atmosphere. Human eHAP1 cells were cultured in Iscove's Modified  
462 Dulbecco's Medium (IMDM) supplemented with 10% fetal bovine serum (FBS), 1% NEAAs, and 1%  
463 penicillin/streptomycin. Chicken fibroblast (DF-1) (ATCC) cells were maintained in DF-1 cell culture  
464 media (DMEM supplemented with 10% FCS, 5% tryptose phosphate broth (Sigma-Aldrich), 1% NEAAs  
465 and 1% penicillin-streptomycin and maintained at 39 °C in a 5% CO<sub>2</sub> atmosphere.

#### 466 **PGC, DF-1 and eHAP1 cell line generation**

467 PGCs were derived and cultured in FAOT medium as previously described<sup>10</sup>. PGCs were transiently  
468 transfected with 1.5 µg of PX459 V2.0 vector using Lipofectamine 2000 (Invitrogen) and treated with  
469 puromycin as previously described<sup>22</sup>. Subsequently, single cell cultures of puromycin-resistant cells  
470 were established to generate clonal populations for downstream experiments as previously described  
471 in<sup>22</sup>. To identify an ANP32A Δ33 PGC cell line, PCR products were directly sequenced using PCR primers  
472 to analyse mutation genotypes of isolated single cell clones. To identify an ANP32A KO PGC cell line,  
473 PCR products were cloned into pGEM-T Easy vector (Promega) and sequenced using T7 promoter  
474 forward primer by Sanger sequencing. DF-1 cells were transfected with the described CRISPR/Cas9  
475 constructs using Lipofectamine 2000 (Invitrogen) and subject to puromycin selection. Single cell clones  
476 were expanded and analysed by PCR of genomic DNA and Sanger sequencing using primers (5'-  
477 TTTTGCTTACATCTGAGGGC-3', 5'-CCTCCGACGTTATCAGGTTAGT-3') for ANP32A exon1, (5'-  
478 GCTCCCTGGTCTGCTAGTTAT-3', 5'-GGTCTACGCAACCACACATAC-3') for ANP32A exon 5 and (5'-  
479 CCCTTAAGGTGAGCACAGGG-3', 5'-AACATAGCACCCTCCAGC-3') for ANP32B exon2. eHAP1 dKO cells  
480 were generated as described (Staller et al. *in preparation*).

#### 481 **Differentiation of PGCs into adherent fibroblast-like cells (PGC derived fibroblasts)**

482 PGCs were cultured in 500 µl of high calcium FAOT medium containing 1.8 mM CaCl<sub>2</sub> in fibronectin-  
483 coated wells (24-well plate) for 48 hours (Figure S3)<sup>10</sup>. Subsequently, PGCs were transferred into PGC  
484 fibroblast medium and then refreshed every 48 hours by removing and replacing with 300 µl of PGC  
485 fibroblast cell culture medium. Adherent fibroblast-like cells were observed within 72 hours. Cells  
486 were then refed every two days and split 1:4 every four days. PGC fibroblast cell cultures were  
487 expanded to 85-90% confluency in 24-well plates before using for transfection, infection or western  
488 blot analysis. PGC fibroblast cells were maintained in cell culture media (Knockout DMEM (10829018,  
489 Gibco) with 10% ES grade FBS (16141061, Invitrogen), 1 % chicken serum (Biosera), 0.1% 100xNEAA  
490 (Gibco), 0.1% Pyruvate (11360070, Gibco), 0.1% 100xGlutamax (Gibco: 35050-038), 0.5mg ml<sup>-1</sup>  
491 ovotransferin (C7786, Sigma)) and 1% penicillin-streptomycin at 37°C with 5% CO<sub>2</sub>.

#### 492 **Influenza A virus infection**

493 Recombinant influenza A PR8 (A/PR/8/34 (H1N1)) 3:5 reassortant viruses (PR8 HA, NA and M genes  
494 with PB1, PB2, PA, NP and NS genes from either A/duck/Belgium/24311/12 (H9N2) or A/Anhui/1/13  
495 (H7N9) were generated by reverse genetics at The Pirbright Institute, UK. Reverse genetics virus  
496 rescue was performed by transfection of Human Embryonic Kidney (HEK) 293T cells (ATCC) with eight  
497 bi-directional PHW2000 plasmids containing the appropriate influenza A virus segments and co-  
498 culture in Madin-Darby Canine Kidney (MDCK) cells (ATCC) with addition of 2µg ml<sup>-1</sup> of TPCK treated  
499 Trypsin (Sigma-Aldrich). Rescued viruses were passaged once in embryonated hen's eggs to generate



500 working stocks. Recombinant PR8 3:5 reassortant 50-92 (A/turkey/England/50-92/1991 (H5N1) was  
501 described previously<sup>4</sup>.

502 Virus was diluted in Knockout DMEM and incubated on PGC fibroblast cells for 1 h at 37 °C (MOI as  
503 indicated in the relevant figure legends) and replaced with infection media (Knockout DMEM  
504 (10829018, Gibco), 0.14% BSA and 1 µg ml<sup>-1</sup> TPCK trypsin (Sigma-Aldrich)). Cell supernatants were  
505 harvested and stored at -80°C. Infectious titres were determined by plaque assay on MDCK cells.

#### 506 **Minigenome assay**

507 Influenza polymerase activity was measured by use of a minigenome reporter which contains the  
508 firefly luciferase gene flanked by the non-coding regions of the influenza NS gene segment, transcribed  
509 from a species-specific poll plasmid with a mouse terminator sequence. The human and chicken poll  
510 minigenomes (pHOM1-Firefly and pCOM1-Firefly) are described previously<sup>32</sup>. pCAGGS expression  
511 plasmids encoding each polymerase component and NP for 50–92 (H5N1 A/Turkey/England/50–  
512 92/91) are described previously<sup>33</sup>. To measure influenza polymerase activity, 293T cells were  
513 transfected in 48-well plates with pCAGGS plasmids encoding the PB1 (20 ng), PB2 (20 ng), PA (10 ng)  
514 and NP (40 ng) proteins, together with 20 ng species-specific minigenome reporter, either Empty  
515 pCAGGS or pCAGGS expressing ANP32 (50ng) and, as an internal control, 10 ng Renilla luciferase  
516 expression plasmid (pCAGGS-Renilla), using Lipofectamine 3000 transfection reagent (Invitrogen)  
517 according to manufacturers' instructions. DF-1 and PGC fibroblast cells were transfected as 293T cells  
518 but with twice the concentration of DNA. Cells were incubated at 37 °C. 20-24 h after transfection,  
519 cells were lysed with 50 µl of passive lysis buffer (Promega), and firefly and Renilla luciferase  
520 bioluminescence was measured using a Dual-luciferase system (Promega) with a FLUOstar Omega  
521 plate reader (BMG Labtech).

#### 522 **Split luciferase assay**

523 293T cells were transfected with PB1<sup>luc1</sup> (25ng), either PB2 627E or PB2 627K (25ng), PA (12.5ng) and  
524 chANP32A<sup>luc2</sup>, chANP32AN129I<sup>luc2</sup>, chANP32B<sup>luc2</sup> or chANP32B<sub>33</sub><sup>luc2</sup> (12.5ng). For split luciferase assays  
525 measuring histone interaction, 50ng of either chANP32A<sup>luc2</sup>, chANP32AN129I<sup>luc2</sup>, H4<sup>luc1</sup> or H3<sup>luc2</sup> were  
526 transfected into 293T cells. Control samples assessed the interaction between H4 or PB1<sup>luc1</sup> and an  
527 untagged luc2 construct or the appropriate ANP32A<sup>luc2</sup> construct and an untagged luc1 construct. All  
528 other components transfected into control samples remained consistent with those transfected in  
529 with the interacting proteins of interest. 24 hours after transfection, cells were lysed in 50ul Renilla  
530 lysis buffer (Promega) for one hour at room temperature. *Gaussia* luciferase activity was then  
531 measured from 10ul of lysate using the Renilla luciferase kit (Promega) with a FLUOstar Omega plate

532 reader (BMG Labtech). Normalised luminescence ratios were calculated by dividing the luminescence  
533 measured from the interacting partners by the sum of the interaction measured from the two controls  
534 for each sample (Figure S5a) as previously described<sup>18</sup>.

### 535 **Immunoblot analysis**

536 For analysis of PGC derived fibroblasts (Figure 3b), at least 300,000 cells were lysed in 60 µl of 1X RIPA  
537 lysis buffer (sc-24948, Santa Cruz Biotechnology) according to the manufacturer's instruction. Protein  
538 concentration was determined using the Bradford method with the Quick Start™ Bradford Protein  
539 Assay Kit (#5000202, BIORAD) according to the manufacturer's instruction<sup>34</sup>. Denaturing  
540 electrophoresis and western blotting were performed using the NuPAGE® electrophoresis system  
541 (Invitrogen) following the manufacturer's protocol. For all other Western blots, cells were lysed in lysis  
542 buffer (50mM Tris-HCl pH 7.8 (Sigma Aldrich), 100mM NaCl, 50mM KCl and 0.5% Triton X-100 (Sigma  
543 Aldrich), supplemented with cComplete™ EDTA free Protease inhibitor cocktail tablet (Roche)) and  
544 prepared in Laemmli 2× buffer (Sigma-Aldrich). Cell proteins were resolved by SDS-PAGE using Mini-  
545 PROTEAN TGX Precast Gels (Bio-Rad). Immunoblotting was carried out using the following primary  
546 antibodies: rabbit α-ANP32A (Sigma-Aldrich #AV40203), mouse α-β-actin (Sigma-Aldrich #A2228),  
547 mouse α-FLAG (F1804, Sigma-Aldrich), mouse α-Lamin B1 (MAB5492, Merck), mouse α-PCNA (C0907,  
548 Santa Cruz), rabbit α-Histone 3 (AB1791, Abcam), rabbit α-vinculin (AB129002, Abcam), rabbit α-  
549 *Gaussia* Luc (E80235, NEB), rabbit α-PB1 (PA5-34914, Invitrogen) and rabbit α-PB2 (GTX125926,  
550 GeneTex). The following secondary antibodies were used: goat anti-rabbit HRP (CST #7074), anti-  
551 mouse HRP (CST #7076), goat α-mouse AlexaFluor-568 (A11031, Invitrogen), sheep α-rabbit HRP  
552 (AP510P, Merck) and goat α-mouse HRP (STAR117P, AbD Serotec). Protein bands were visualized by  
553 chemiluminescence (ECL+ western blotting substrate, Pierce) using a FUSION-FX imaging system  
554 (Vilber Lourmat).

### 555 **Quantification of chANP32A, B and E mRNA levels**

556 Total RNA from PGC fibroblast and DF-1 cells were extracted using an RNeasy mini kit (Qiagen),  
557 following manufacturer's instructions. During extraction of RNA, RNeasy columns were treated with  
558 RNase-Free DNase (Qiagen). RNA samples were quantified using a Nanodrop Spectrophotometer  
559 (Thermo Scientific). Equal concentrations of RNA were subject to first strand synthesis using RevertAid  
560 (Thermo Scientific) with Oligo(dT) (Thermo Scientific). This product was then quantified with Fast  
561 SYBR™ Green Master Mix (Thermo Scientific) using the following sequence-specific primer pairs: RS17,  
562 (5'-ACACCCGCTCTGGGCAACGACT-3' and 5'-CCCGCTGGATGCGCTTCATCA-3'), RPL30 (5'-  
563 CCAACAACCTGTCCTGCTTT-3' and 5'-GAGTCACCTGGGTCAATAA-3'), chANP32A (5'-  
564 GTTTGCAACTGAGGCTAAGC-3' and 5'-CAACTGTAGGTCATACGAAGGC-3'), chANP32B (5'-

565 GGTGGCCTTGAAGTTCTAGC-3', and 5'-ATGAGCATCGTCACCTCGC-3'), chANP32E (5'-  
566 GAACTAGAGTTTCTTAGCATGG-3' and 5'- TCTCTCTGCAAGGACCTCCAG-3'). Real-time quantitative PCR  
567 analysis was performed (Applied Biosystems ViiA 7 Real-Time PCR System).

#### 568 **Safety/biosecurity**

569 All work with infectious agents was conducted in biosafety level 2 facilities, approved by the Health  
570 and Safety Executive of the UK and in accordance with local rules, at Imperial College London, UK.

#### 571 **Bioinformatics**

572 ANP32 sequences were downloaded from Ensembl (Gene Trees ENSGT00940000153254 and  
573 ENSGT00940000154305.) Amino acid sequences were aligned using MUSCLE<sup>35</sup> and the maximum  
574 likelihood tree was constructed using RAxML-HPC2 v.8.2.10<sup>36</sup> (GTRGAMMA model, 100 bootstraps) on  
575 XSEDE run on CIPRES<sup>37</sup>. Mapmodulin from *Drosophila melanogaster* was used as an outgroup.

576

#### 577 **Supplementary Information**

578

#### 579 **Supplementary Figure 1. Phylogenetic and sequence analysis reveals avian ANP32B to be a paralog** 580 **of mammalian ANP32B.**

581 Full tree used to make the cladogram in Figure 1. This tree was made using RAxML with 100 bootstraps  
582 and mapmodulin as an outgroup.

#### 583 **Supplementary Figure 2. Synteny of ANP32 genes.**

584 Chromosome locations of ANP32 family members A, B, C and E from coelacanth (*Latimeria*  
585 *chalumnae*), *Xenopus* (*Xenopus tropicalis*), chicken (*Gallus gallus*), zebra finch (*Taeniopygia guttata*),  
586 opossum (*Monodelphis domestica*), mouse (*Mus musculus*) and Human (*Homo sapiens*).

#### 587 **Supplementary Figure 3. Sequence analysis of ANP32 in genome edited chicken cells.**

588 **a.** DNA sequence analysis of ANP32B from genomic DNA of DF-1 WT and  $\Delta$ B clones, showing the target  
589 sequence of the gRNA pair used in the CRISPR/Cas9 reaction. Allele A had a 16bp deletion and allele  
590 B a 40bp deletion, resulting in premature stop codons in the ANP32B sequence. Alignment of DNA  
591 sequence from WT,  $\Delta$ 33 and KO PGCs, showing the target sequence of the gRNAs used in the  
592 CRISPR/Cas9 reaction. **b.** Comparison between WT and KO PGCs showed an 8bp deletion in exon 1 of  
593 ANP32A in KO PGC cells, resulting in a truncated ANP32A protein. **c.** Intron and exon 5 sequence

594 comparison of WT and  $\Delta 33$  cells revealed a 400bp deletion resulting in the loss of exon 5. **d.** qRT-PCR  
595 analysis of mRNA isolated from WT and bKO DF-1 cells. Data are  $\Delta$ ct of RPL30, ANP32A, B or E to RS17.  
596 **e.** qRT-PCR analysis of mRNA isolated from WT,  $\Delta 33$  or aKO PGC derived fibroblast cells. Data are  $\Delta$ ct  
597 of RS17, ANP32A, B or E to RPL30. Annotated alignments generated using Geneious R6 software.

598 **Supplementary Figure 4. *In vitro* reprogramming of chicken PGCs into adherent fibroblast-like cells.**

599 a. Diagram describing the method to differentiate PGCs from day 3 chicken embryos. b. Fluorescent  
600 images of live cells demonstrating the differentiation of GFP<sup>+</sup> PGCs into fibroblast-like cells.

601 **Supplementary Figure 5. Nuclear localisation of exogenously expressed ANP32 proteins in 293T**  
602 **cells.**

603 Immunofluorescent images of 293T cells expressing ANP32 constructs fixed and stained with DAPI to  
604 highlight the nucleus. **a.** FLAG-tagged ANP32A constructs were imaged by probing with mouse  $\alpha$ -FLAG  
605 antibody and detected by  $\alpha$ -mouse AlexaFluor-568: Empty vector(1), huANP32B(2), huANP32B<sup>33</sup>(3),  
606 chANP32B(4), chANP32B<sup>33</sup>(5), huANP32B<sup>33</sup><sub>LRR</sub>(6), huANP32B<sup>33</sup><sub>CENT</sub>(7), huANP32B<sup>33</sup><sub>LCAR</sub>(8),  
607 huANP32B<sup>33</sup><sub>N+LRR1</sub>(9), huANP32B<sup>33</sup><sub>LRR2+3</sub>(10), huANP32B<sup>33</sup><sub>LRR4+5</sub>(11), chANP32A(12), chANP32A<sub>scr149-</sub>  
608 <sub>175</sub>(13), chANP32A<sub>scr176-208</sub>(14). **b.** ANP32A with mCherry fused to the C-terminus: Empty Vector(1),  
609 chANP32A(2), chANP32B(3), chANP32A<sub>K116H</sub>(4), chANP32A<sub>N127M</sub>(5), chANP32A<sub>N129I</sub>(6),  
610 chANP32A<sub>D130N</sub>(7), chANP32A<sub>K137T</sub>(8). All images were prepared using ImageJ<sup>26</sup> and Microsoft  
611 PowerPoint.

612 **Supplementary Figure 6. Avian ANP32B proteins share the I129 and N130 residues in LRR5.**

613 Alignment comparing sequence of LRR5 ANP32B sequence from *Homo sapiens* and 22 avian species  
614 (residues 115 to 141). Protein sequences downloaded from NCBI and aligned using Geneious R6  
615 software.

616 **Supplementary Figure 7. Western blot analysis of split luciferase constructs.**

617 **a.** Normalised luciferase Ratio was calculated by the equation described in this diagram, whereby the  
618 bioluminescence measured by interacting partners A and B fused to luc1 and luc2 are divided by the  
619 sum of the bioluminescence of the unfused controls. **b.** Western blot analysis of luc-fused constructs  
620 ( $\alpha$ -Vinculin, PB1, *Gaussia* luciferase and histone 3).

621

Figure 1

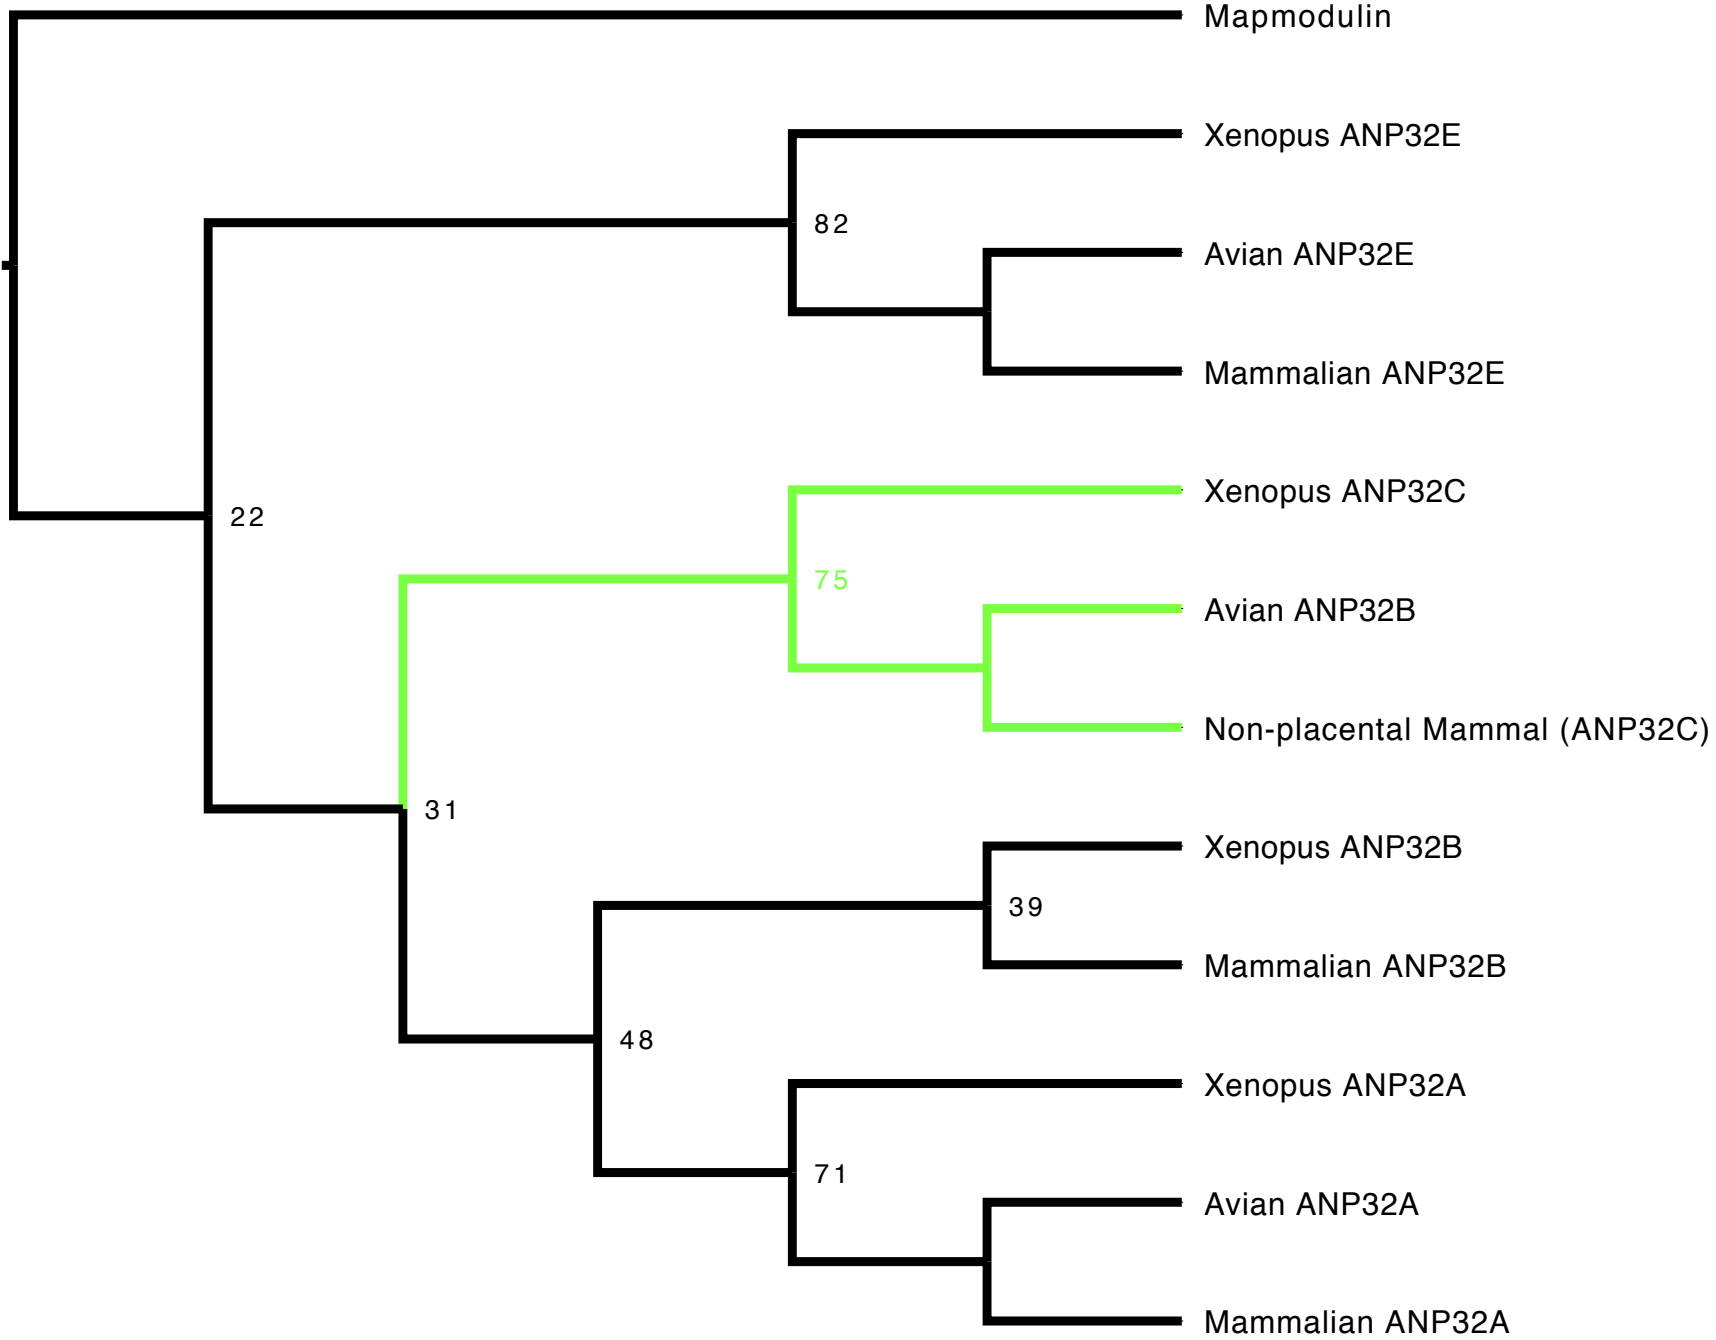

Figure 2.

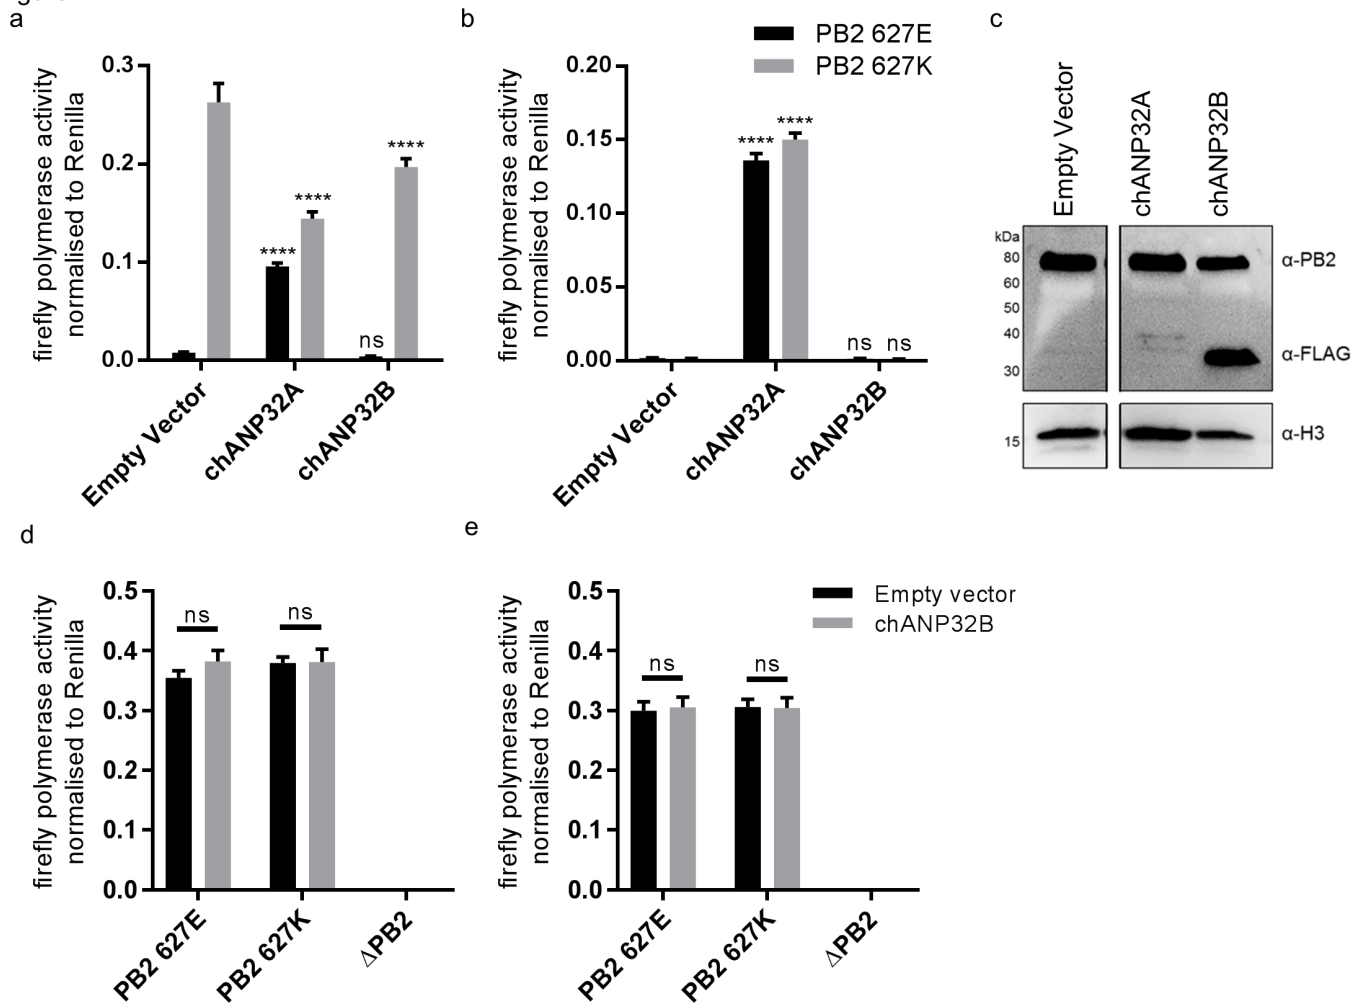

Figure 3.

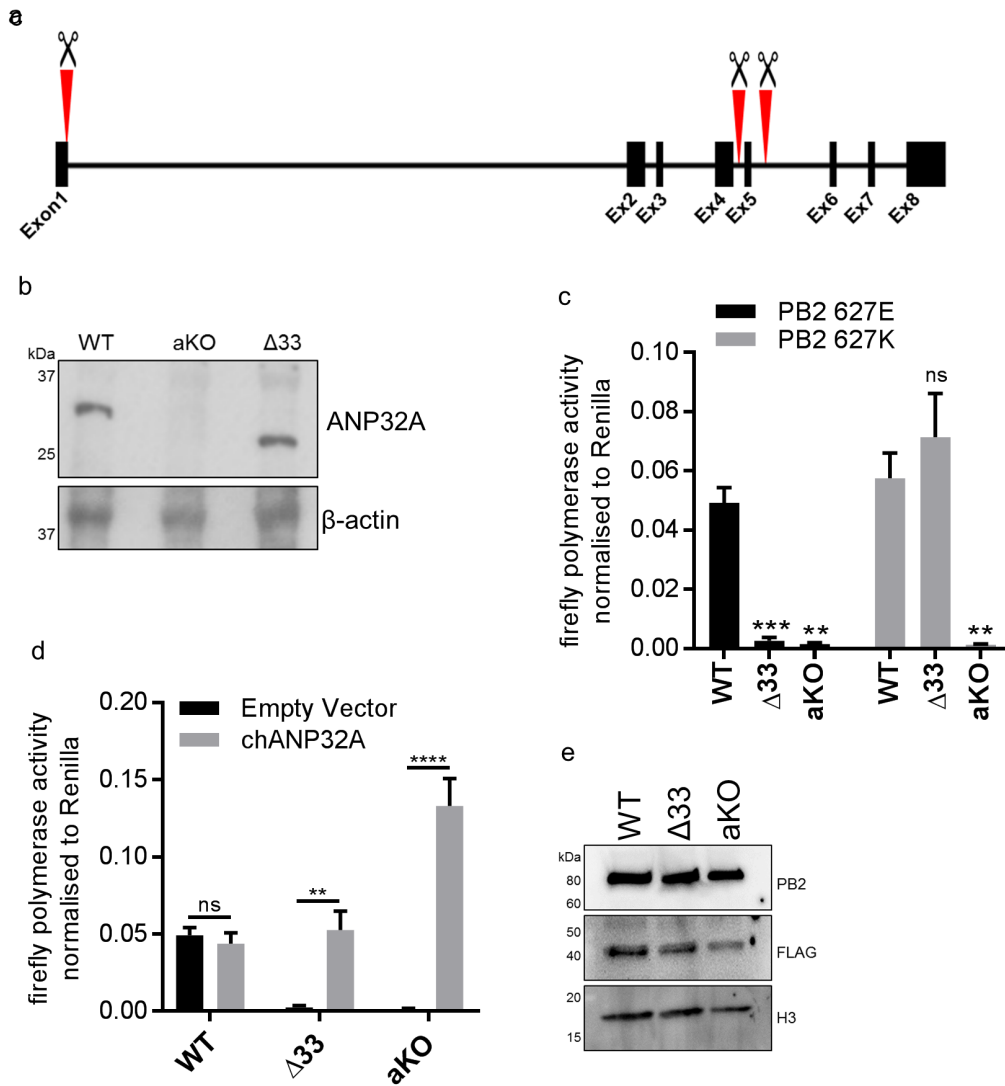

Figure 4.

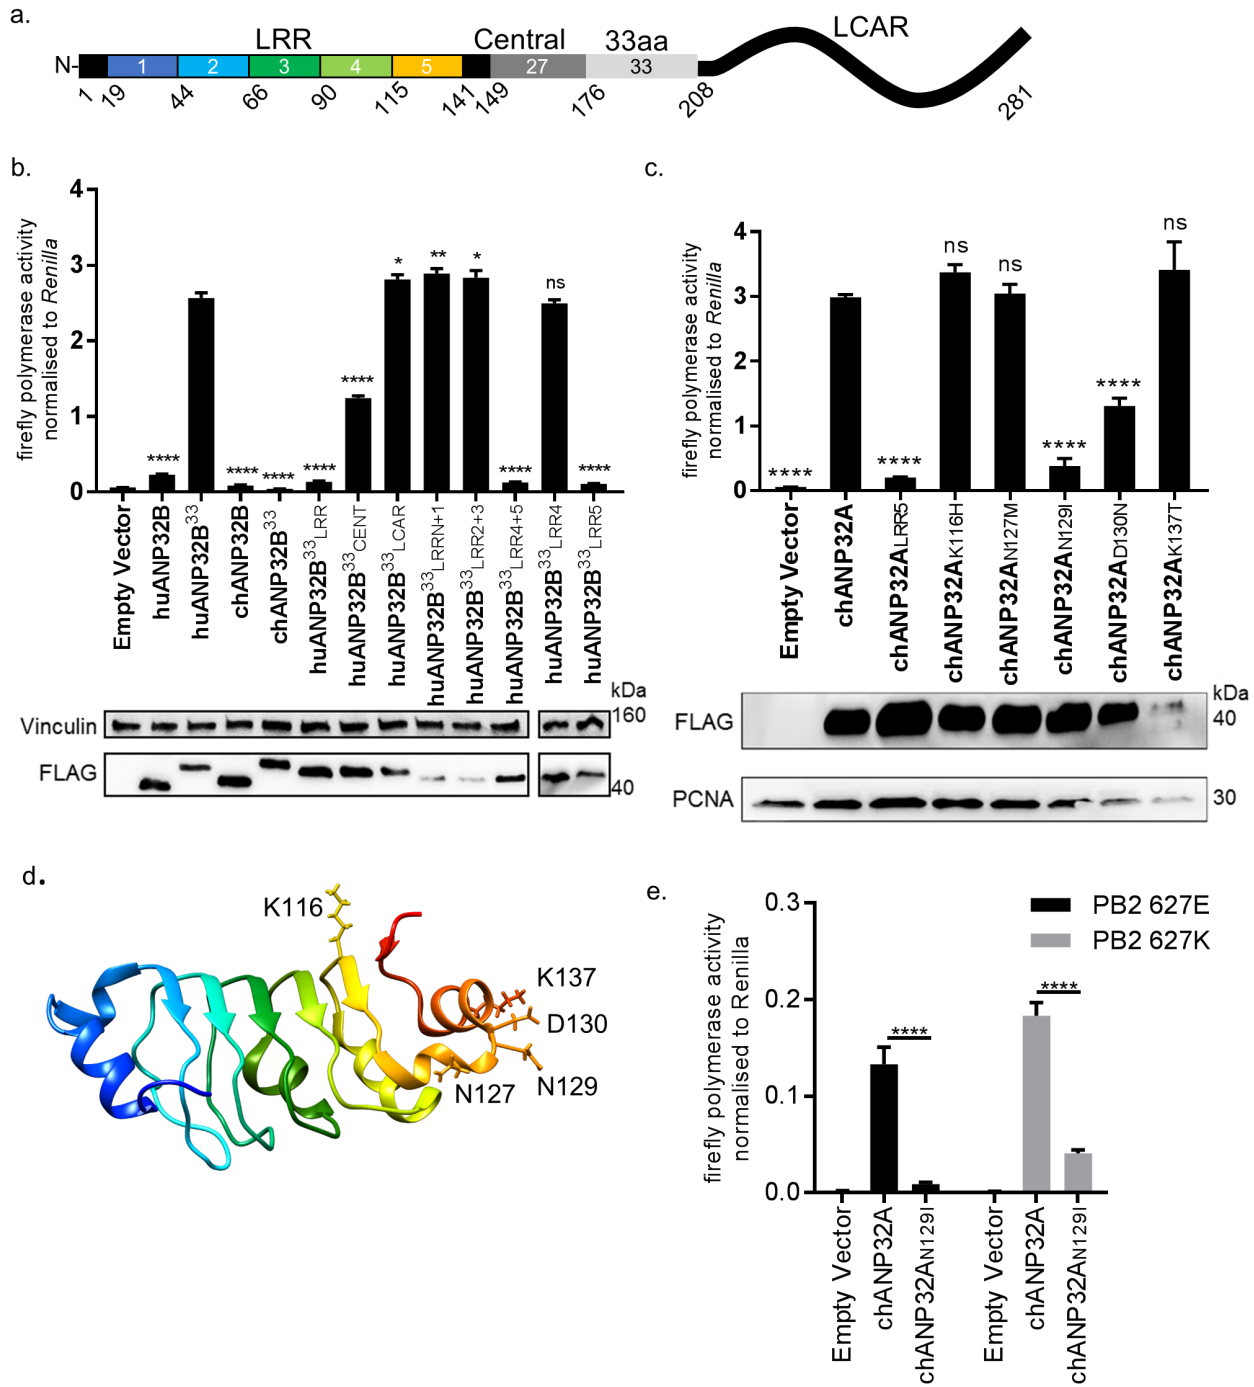



Figure 5.

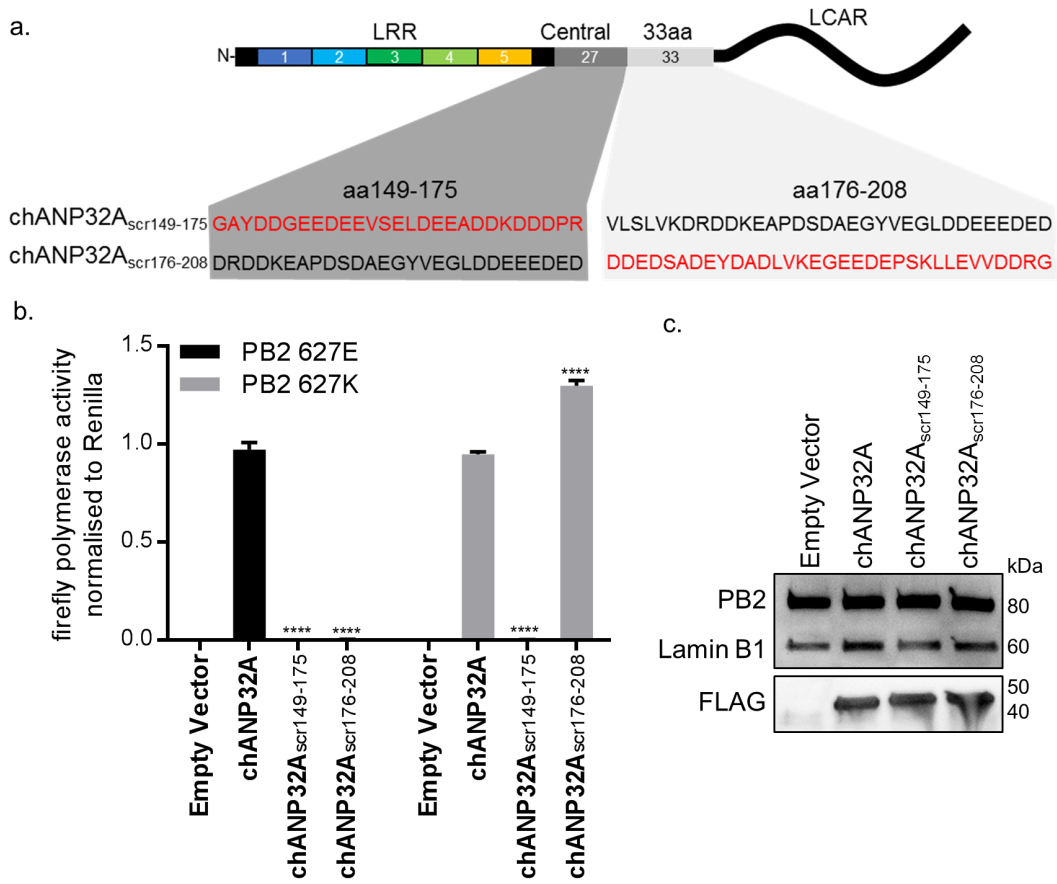

Figure 6.

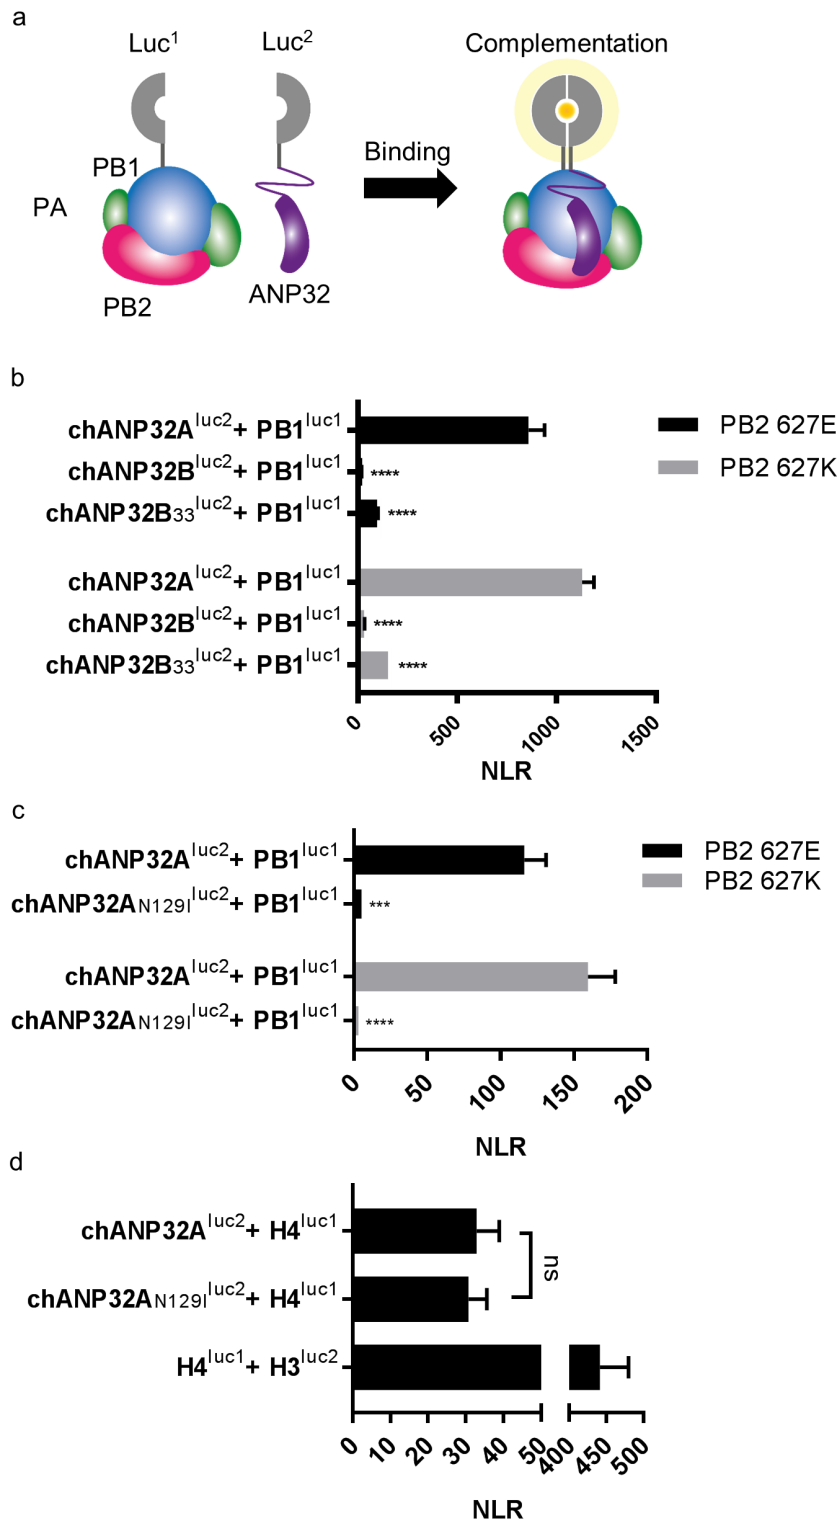

Figure 7.

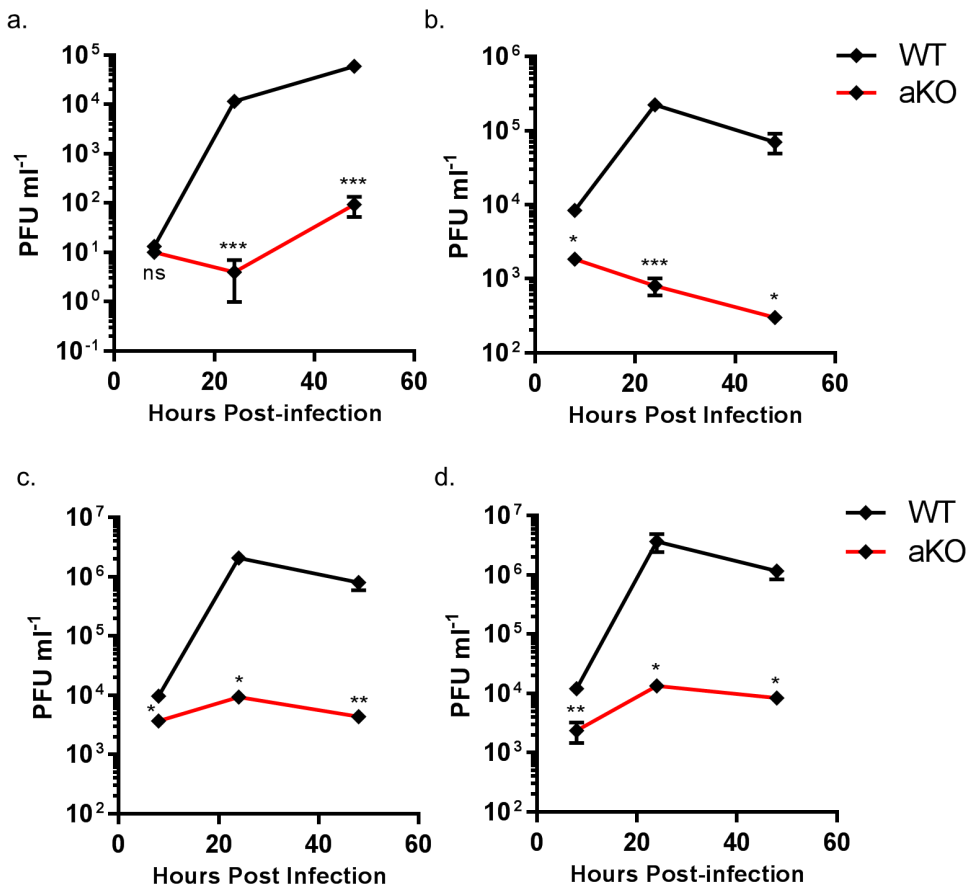

Source: https://www.biorxiv.org/content/10.1101/512012v1.full.pdf
